# Supplementary material for: Behavior problems and personality in Korean high school students
Source: PeerJ. 2018 Dec 10;6:e6106. doi: 10.7717/peerj.6106 (PMC6292374; doi:10.7717/peerj.6106)
Supplement: Supplemental Information 1 — Data for analyzing relation between TCI and YSR subscales are provided. [file peerj-06-6106-s001.xlsx]

## Sheet: TCI&YSR
Sex	NS	HA	RD	PS	SD	CO	ST	YSR_total	YSR_Internal	YSR_External	YSR_DepAnx	YSR_Withdra	YSR_Somatiz	YSR_SocialImma	YSR_CogProb	YSR_AttnProb	YSR_RuleViol	YSR_Aggress	YSR_Others
1	19	21	14	18	31	27	21	30	13	7	4	7	2	3	4	3	1	6	0
1	21	24	15	14	17	25	20	40	12	8	4	5	3	3	6	8	2	6	3
1	12	20	6	14	28	20	23	69	25	21	9	8	8	2	9	9	13	8	3
1	29	18	8	6	18	17	11	62	17	17	3	11	3	4	5	10	5	12	9
1	12	12	17	16	30	29	12	25	3	14	3	0	0	0	0	3	7	7	5
1	28	21	23	15	26	19	17	27	4	8	3	0	1	3	4	4	1	7	4
1	24	15	12	14	32	24	15	41	17	9	9	7	1	5	3	5	4	5	2
1	24	23	10	17	27	26	18	55	15	15	7	6	2	5	7	7	3	12	6
1	23	23	15	12	17	20	17	9	1	4	1	0	0	1	0	1	1	3	2
1	39	36	6	3	9	0	0	160	44	55	20	13	11	20	11	18	24	31	12
1	15	25	11	16	26	28	11	50	16	11	6	7	3	1	5	8	6	5	9
1	22	11	22	20	25	28	17	24	1	11	1	0	0	2	2	2	3	8	6
1	19	32	14	11	17	23	13	46	10	12	6	3	1	4	5	10	4	8	5
1	15	23	12	13	23	30	21	43	12	16	5	5	2	1	3	4	5	11	7
1	19	20	18	13	20	26	16	25	1	10	1	0	0	1	4	6	3	7	3
1	26	24	15	10	19	18	14	40	6	12	4	1	1	4	4	10	3	9	4
1	24	16	15	10	27	30	14	20	3	7	3	0	0	1	1	6	2	5	2
1	24	35	8	9	10	23	9	95	35	16	16	13	6	12	9	15	6	10	8
1	22	15	12	11	24	26	13	37	4	12	1	1	2	4	3	5	4	8	9
1	16	19	14	14	15	32	26	25	7	6	3	3	1	1	2	4	2	4	5
1	15	6	20	11	27	32	4	13	1	4	1	0	0	1	2	3	1	3	2
1	20	25	20	14	28	23	17	17	4	5	2	2	0	0	3	3	0	5	2
1	12	31	20	10	23	29	14	50	15	8	8	3	4	3	6	13	3	5	5
1	18	16	15	11	19	26	12	11	3	1	1	2	0	0	1	6	0	1	0
1	18	35	11	10	8	28	16	60	24	8	11	9	4	5	8	12	2	6	3
1	20	25	12	14	22	21	16	39	11	11	9	2	0	4	3	6	4	7	4
1	11	28	11	12.5	24	25	9	31	14	3	8	5	1	5	2	1	1	2	6
1	24	32	11	11	18	25	9	70	24	11	11	7	6	4	11	10	7	4	10
1	18	22	14	16	24	23	10	28	8	12	4	1	3	1	1	1	6	6	5
1	29	16	10	14	25	23	8	15	4	3	2	1	1	0	1	5	1	2	2
1	11	31	16	13	17	30	17	47	20	8	6	8	6	3	5	7	2	6	4
1	16	23	10	12	23	25	11	24	9	5	4	2	3	2	3	3	3	2	2
1	17	27	13	11	25	26	18	39	12	8	5	4	3	3	3	8	3	5	5
1	19	29	13	12	18	27	16	46	18	7	8	9	1	6	3	11	2	5	1
1	12	20	17	18	25	33	17	16	3	4	3	0	0	4	1	3	1	3	1
1	29	35	15	16	14	32	23	101	37	21	24	9	4	11	9	14	5	16	9
1	6	19	15	15	26	30	14	10	2	2	1	1	0	0	1	5	1	1	0
1	6	23	9	15	24	29	14	28	9	4	0	9	0	4	3	5	4	0	3
1	31	20	7	11	12	19	21	73	17	20	7	5	5	12	4	11	4	16	9
1	22	20	11	14	24	27	22	34	13	5	7	4	2	1	1	8	3	2	6
1	18	22	13	16	32	32	17	30	11	9	5	3	3	1	1	5	4	5	3
1	18	11	8	13	28	29	12	36	9	10	0	4	5	2	3	8	4	6	4
1	15	23	18	13	19	24	15	27	9	7	7	1	1	3	2	4	3	4	2
1	14	29	24	18	18	30	12	46	19	9	8	2	9	4	5	4	3	6	5
1	17	19	16	16	25	27	12	4	1	0	0	1	0	0	2	1	0	0	0
1	18	18	16	19	28	42	24	29	11	5	7	3	1	2	1	6	2	3	4
1	22	21	13	11	20	25	14	85	21	30	6	7	8	8	15	3	14	16	8
1	22	24	15	10	13	24	15	80	28	22	12	9	7	4	10	11	9	13	5
1	21	19	13	14	16	24	19	28	5	4	0	3	2	4	3	7	2	2	5
1	22	23	17	11	21	23	17	23	8	4	4	3	1	0	2	8	1	3	1
1	19	20.5	23	18	23	25	22	17	4	4	1	0	3	3	1	1	0	4	4
1	32	12	20	14	28	23	17	57	6	22	6	0	0	8	4	8	5	17	9
1	34	28	15	11	15	21	20	59	18	12	9	3	6	6	5	9	3	9	9
1	17	24	14	5	10	9	6	30	6	8	4	1	1	3	2	6	3	5	5
1	19.5	15	17	16	26	26	15	4	1	0	0	0	1	1	0	1	0	0	1
1	13	29	9	15	20	21	5	59	16	13	6	8	2	6	8	12	3	10	4
1	23.5	25	19	12	20	24	22	62	18	19	8	2	8	4	5	8	4	15	8
1	29	31	23	19	29	23	27	21	1	9	0	1	0	1	2	3	1	8	5
1	16	26	15	16	22	28	16	24	11	5	6	3	2	2	2	3	1	4	1
1	18	16	24	20	32	34	23	17	1	6	0	0	1	1	0	5	1	5	4
1	22	19	11	13	24	17	10	44	12	12	6	5	1	6	5	7	3	9	2
1	16	23	16	12	19	24	19	31	8	9	5	3	0	4	2	7	3	6	1
1	20	25	17	14	22	24	17	43	10	9	6	4	0	4	7	7	1	8	6
1	20	19	16	14	25	19	17	93	28	27	13	5	10	11	11	9	12	15	7
1	15	28	8	18	22	22	14	66	31	6	15	11	5	9	9	7	1	5	4
1	26	26	19	12	21	30	17	44	7	13	2	1	4	3	2	12	6	7	7
1	22	24	17	9	19	20	14	58	12	13	6	4	2	10	5	12	6	7	6
1	23	28	16	9	21	22	16	16	1	4	0	1	0	2	1	6	1	3	2
1	19	18	15	10	12	28	20	46	13	12	5	3	5	4	8	8	4	8	1
1	23	15	24	14	18	30	19	29	5	7	3	2	0	3	3	9	3	4	2
1	26	19	17	13	20	25	19	29	3	12	2	1	0	1	2	8	2	10	3
1	14	20	14	11	19	25	13	27	6	11	2	3	1	2	1	3	4	7	4
1	17	25	23	14	22	26	20	65	16	17	7	1	8	4	6	12	5	12	10
1	23	24	18	13	21	26	15	15	0	4	0	0	0	0	1	6	2	2	4
1	27	31	19	10	17	33	15	54	17	13	12	4	1	4	3	12	4	9	5
1	13	28	13	12	15	23	19	21	5	4	2	3	0	3	0	3	3	1	6
1	22	29	12	10	13	16	18	55	13	10	4	6	3	10	4	14	2	8	4
1	28	13	13	11	27	24	15	38	10	5	6	2	2	2	10	7	1	4	4
1	14	36	18	9	22	32	19	65	33	5	14	11	8	8	4	10	2	3	5
1	29	28	16	9	9	22	13	99	19	33	15	2	2	12	9	16	7	26	10
1	20	21	11	13	19	23	16	37	15	4	7	6	2	5	5	6	1	3	2
1	24	20	11	12	25	24	15	28	5	13	2	3	0	3	1	3	5	8	3
1	12	13	19	14	28	35	19	31	5	9	2	2	1	1	4	9	2	7	3
1	16	33	11	14	11	30	20	65	34	5	15	13	6	6	7	10	0	5	3
1	26	30	18	4	13	27	19	48	12	16	4	5	3	3	2	14	3	13	1
1	16	19	21	9	26	40	22	28	6	6	1	1	4	3	4	4	1	5	5
1	23	29	19	12	20	21	21	30	4	8	3	1	0	1	4	9	4	4	4
1	35	17	15	6	11	34	23	47	9	13	6	2	1	2	6	11	6	7	6
1	18	21	18	18	28	28	17	15	5	1	1	0	4	2	1	3	0	1	3
1	26	19	21	11	24	25	19	38	10	9	8	1	1	4	4	7	4	5	4
1	13	27	9	9	12	27	22	63	23	8	12	11	0	7	9	12	4	4	4
1	12	11	14	12	25	28	25	14	3	4	2	1	0	0	0	7	2	2	0
1	16	22	19	12	28	26	17	40	7	17	5	1	1	3	2	6	9	8	5
1	18	17	12	22	30	31	15	32	4	17	1	3	0	2	1	3	6	11	5
1	24	18	18	12	27	36	19	34	5	14	2	2	1	1	2	6	7	7	6
1	15	27	21	13	19	30	20	16	9	2	8	1	0	3	1	1	1	1	0
1	18	18	22	15	22	32	18	25	8	7	5	3	0	2	2	2	4	3	4
1	19	33	15	12	18	24	19	40	12	8	7	5	0	3	3	8	3	5	6
1	17	19	18	19	31	34	16	12	2	2	1	1	0	0	1	4	0	2	3
1	18	18	16	14	24	28	19	28	5	9	3	1	1	2	3	6	3	6	3
1	27	26	16	9	12.5	21	17	80	17	19	11	4	2	15	7	14	7	12	8
1	26	18	18	15	26	29	12	49	7	18	5	1	1	3	3	11	4	14	7
1	18	15	19	12	25	27	13	3	0	0	0	0	0	1	0	0	0	0	2
1	19	20	14	15	20	27	15	44	15	11	4	8	3	3	3	7	2	9	5
1	16.5	19	13	18	27.5	33	10.5	17	5	5	2	3	0	3	3	0	2	3	1
1	24	24.5	11	13	28	28	21	76	27	15	10	11	6	5	13	9	7	8	7
1	16	20	21	20	26	33	22	13	3	2	2	0	1	0	2	3	0	2	3
1	17	38	14	15	11	29	9	63	24	11	14	4	6	7	5	9	2	9	7
1	27	31	14	17	33	21	22	48	13	18	7	4	2	2	4	5	7	11	6
1	13	30	10	13	20	19	17	46	19	11	10	8	1	4	2	8	4	7	2
1	17	34	8	12	10	16	14	72	25	14	13	10	2	10	7	11	3	11	5
1	10	32	14	18	22	30	21	74	29	11	15	9	5	10	9	7	5	6	8
1	22	24	10	7	20	20	14	29	6	10	2	1	3	1	4	5	2	8	3
1	16	25	13	14	21	28	20	56	23	9	9	8	6	5	8	7	4	5	4
1	25	13.5	12	7	23	19	16	40	8	14	2	6	0	2	5	5	5	9	6
1	14	27	24	18	24	38	28	56	14	9	7	2	5	6	9	12	0	9	6
1	19	8	24	13	23	28	12	20	0	12	0	0	0	1	1	2	3	9	4
1	13	34	11	16	19	33	22	51	23	7	11	9	3	3	8	6	0	7	4
1	13	28	12	9	12	27	22	44	13	7	4	7	2	3	6	11	3	4	4
1	20	19	19	18	24	34	28	76	23	17	7	9	7	4	13	10	6	11	9
1	20	15	20	19	33	30	20	30	3	14	2	1	0	2	4	2	6	8	5
1	20	29	13	11	17	33	22	40	12	6	8	4	0	6	6	7	1	5	3
1	10	12	18	21	37	31	19	11	4	3	2	2	0	1	1	2	0	3	0
1	28	35	16	11	15	19	23	47	12	10	7	5	0	6	5	12	3	7	2
1	24	22	15	14	22	24	15	23	2	5	0	2	0	1	4	7	2	3	4
1	12	30	12	15	20	20	19	51	21	4	7	12	2	8	9	4	1	3	5
1	20	28	18	11	13	28	14	47	13	9	8	3	2	7	4	9	3	6	5
1	25	17	15.5	13	25	20	19	93	29	28	13	7	9	11	10	9	11	17	6
1	28	26	15	11	24	19	17	48	10	16	5	5	0	6	3	9	4	12	4
1	24	32	11	16	18	17	6	36	12	10	3	5	4	4	4	5	3	7	1
1	22	21	8	7	27	16	7	28	2	6	1	1	0	5	2	11	2	4	2
1	19	17	12	16	25	22	10	15	4	2	3	1	0	1	1	3	0	2	4
1	12	28	15	16	15	27	24	80	31	15	16	11	4	10	6	11	5	10	7
1	19	20	12	10	25	25	11	8	4	2	1	1	2	0	1	1	0	2	0
1	19	19	13	9	26	20	12	36	13	10	5	5	3	2	5	2	3	7	4
1	21	26	9	8	17	25	17	78	25	10	11	9	5	12	10	15	4	6	6
1	22	17	18	17	28	22	20	22	6	6	4	0	2	2	2	3	3	3	3
1	24	16	16	12	22	23	10	19	2	9	0	1	1	1	0	5	2	7	2
1	24	16	16	12	22	23	10	19	2	8	0	1	1	1	1	5	2	6	2
1	18	25	9	6	20	20	11	57	17	15	6	7	4	6	3	10	5	10	6
1	14	30	11	12	14	22	10	27	9	4	4	4	1	3	1	9	1	3	1
1	17	24	18	18	23	31	19	41	13	5	9	3	1	7	7	6	1	4	3
1	18	16	15	16	25	28	14	4	1	1	1	0	0	0	0	2	1	0	0
1	16	15	15	12	22	22	19	35	8	12	3	3	2	3	1	5	2	10	6
1	31	29	10	11	17	19	21	88	25	19	12	8	5	11	10	16	3	16	7
1	23	29	15	14	20	27.5	21	19	4	2	2	1	1	4	2	4	1	1	3
1	30	18	18	19	26	23	17	41	9	12	3	2	4	3	2	8	2	10	7
1	19	19	16	12	21	25	13	33	4	13	2	1	1	3	2	7	7	6	4
1	15	37	11	7	17	21	20	107	32	23	13	14	5	14	14	14	8	15	10
1	19	17	14	11	22	25	16	14	3	6	2	1	0	0	2	1	2	4	2
1	16	21	18	14	25	25	16	19	8	2	2	5	1	2	3	3	0	2	1
1	23	18	21	16	31	37	19	18	1	5	1	0	0	0	1	6	0	5	5
1	12	16	8	9	20	22	8	0	0	0	0	0	0	0	0	0	0	0	0
1	22	32	19	15	24	28	17	70	28	13	12	7	9	5	8	10	4	9	6
1	24	18	13.5	13	23.5	24	14.5	25	3	8	1	2	0	2	3	5	2	6	4
1	24	15	4	15	23	17	11	40	14	12	2	7	5	2	4	5	4	8	3
1	10	19	17	16	27	29	16	15	4	2	2	2	0	0	2	4	1	1	3
1	36	15	18	16	25	21	19	66	8	31	7	0	1	5	3	12	9	22	7
1	21	19	16	15	22	24	15	46	10	13	6	2	2	4	3	8	4	9	8
1	23	23	13	9	19.5	28	20	53	10	15	1	2	7	3	6	7	4	11	12
1	34	19	20	8	20	20	16	84	12	34	9	3	0	4	10	14	16	18	10
1	14	18	17	14	30	28	12	31	7	10	4	3	0	3	1	4	2	8	6
1	21	25	10	8	27	26	12	37	9	11	1	7	1	1	3	10	6	5	3
1	19	15	21	17	25	29	20	25	8	7	5	1	2	3	3	3	3	4	1
1	23	20	13	10	22	22	17	14	1	4	0	1	0	2	2	3	0	4	2
1	20	10	20	14	25	27	13	25	6	8	6	0	0	4	3	3	1	7	1
1	21	16	15	14	25	31	14	12	1	4	1	0	0	1	1	4	1	3	1
1	20	18	21	16.5	26	33	13	18	3	3	3	0	0	2	3	3	0	3	4
1	16	22	19	16	22	21	18	58	26	10	11	8	7	6	4	6	4	6	6
1	18	17	19	13	25	32	12	25	6	5	2	1	3	1	0	9	3	2	4
1	20	19	9	12	23.5	20	8	13	3	3	1	2	0	1	2	2	1	2	2
1	24	19	18	13	19	25	15	2	0	0	0	0	0	0	1	1	0	0	0
1	27	24	11	12	23	25	24	32	8	7	4	2	2	3	2	6	1	6	6
1	24	21	13	12	20	24	14	37	10	11	5	3	2	2	4	6	3	8	4
1	28	20	18	9	18	23	18	56	10	19	5	3	2	8	2	9	8	11	8
1	14	5	19	23	38	31	23	6	0	1	0	0	0	1	1	2	1	0	1
1	23	20	14	14	23	24	16	35	4	11	2	1	1	4	3	6	4	7	7
1	21	30	19	8	15	21	21	22	4	4	2	2	0	3	3	8	1	3	0
1	17	23	12	13	22	23	13	21	6	1	2	3	1	3	1	6	0	1	4
1	17	18	20	13	28	31	18	29	10	11	5	4	1	1	3	1	4	7	3
1	21	24	11	11	17	24	15	26	8	5	4	4	0	4	1	6	1	4	2
1	21	12	6	3	27	24	15	85	23	25	11	5	7	11	10	9	13	12	7
1	20	28	18	13	19	21	17	9	1	3	1	0	0	1	1	1	0	3	2
1	22	14	18	15	28	24	11	24	2	9	1	0	1	3	2	6	3	6	2
1	25	14	18	16	25	23	11	40	12	13	7	1	4	2	3	5	4	9	5
1	23	28	17	10	18	24	17	26	9	7	7	2	0	0	4	3	1	6	3
1	24	23	17	12	16	23.5	16	54	12	17	9	3	0	3	8	10	4	13	4
1	13	28	13	14	13	20	8	44	18	6	10	6	2	4	5	6	2	4	5
1	32	13	15	12	27	20	9	34	2	13	2	0	0	5	2	7	3	10	5
1	22	19	18	16	24	27	18	11	1	5	1	0	0	0	1	4	2	3	0
1	36	17	20	6	18	19	13	51	5	23	4	0	1	3	5	7	10	13	8
1	17	15	24	19	27	31	13	19	2	2	1	0	1	2	4	4	1	1	5
1	22	16	15	16	28	25	16	11	1	7	1	0	0	0	0	3	3	4	0
1	19	21	16	16	20	20	16	20	7	4	4	3	0	2	2	3	2	2	2
1	21	25	16	12	20	23	16	24	8	5	4	4	0	0	3	6	2	3	2
1	21	23	16	13	22	24	19	45	11	7	4	6	1	5	9	9	1	6	4
1	11	21	12	15	23	29	14	41	18	6	5	8	5	4	4	7	2	4	2
1	20	11	22	16	35	36	17	2	0	0	0	0	0	0	1	1	0	0	0
1	14	27	11	13	23	30	18	59	27	6	13	10	4	10	7	7	2	4	2
1	19	23	12	18	24	31	10	44	16	7	4	7	5	3	9	4	5	2	5
1	28	6	8	3	18	3	8	110	33	34	13	7	13	15	10	7	12	22	11
1	23	32	13	17	12	26	17	47	18	7	11	4	3	6	3	11	1	6	2
1	19.5	20	22	18	26	33	20	7	5	1	2	1	2	0	1	0	1	0	0
1	25	23	15	17	20	21	20	93	26	28	11	5	10	11	11	9	12	16	8
1	17	22	15	10	18	26	17	50	18	7	10	7	1	7	5	11	3	4	2
1	18	27	18	13	24	26	15	49	14	15	6	4	4	4	7	6	5	10	3
1	23	9	9	13	32	23	10	25	3	6	1	2	0	1	5	5	2	4	5
1	16	27	18	12	19	31	21	14	7	2	4	1	2	0	3	2	1	1	0
1	24	23	11	15	24	26	22	47	14	13	9	3	2	7	4	7	1	12	2
1	6	32	15	16	22	31	9	34	18	3	7	8	3	2	4	5	2	1	2
1	17	15	17	7	25	21	9	30	8	8	3	1	4	2	2	8	4	4	2
1	23.5	17	15	12	23	29	17	9	3	1	2	1	0	0	1	3	0	1	1
1	19	11	16	14	26	31	24	12	3	0	0	0	3	0	2	5	0	0	2
1	21	17	15	11	19	24	12	83	25	23	9	7	9	10	11	9	12	11	5
1	26	20	25	12	21	33	22	29	3	7	3	0	0	5	1	11	2	5	2
1	17	11	19	20	28	34	24	20	5	5	3	2	0	2	2	3	0	5	3
1	23	23	12	11	12	22	14	56	19	10	7	5	7	6	8	10	2	8	3
1	18	35	15	12	10	24	14	88	32	24	17	11	4	8	8	8	11	13	8
1	26	20	16	12	24	23	5	43	7	16	2	1	4	3	5	8	7	9	4
1	10	29	14	16	18	26	21	48	18	9	9	7	2	8	3	7	0	9	3
1	9	8	20	23	39	40	18	7	1	2	1	0	0	0	1	1	0	2	2
1	20	25	11	9	15.5	22	16	42	12	7	5	4	3	5	3	10	4	3	5
1	27	26	21	13	19	30	15	49	13	18	4	5	4	4	4	3	6	12	7
1	21	19	12	14	23	31	18	35	13	7	6	6	1	2	5	5	3	4	3
1	32	13	15	10	23	25	25	71	9	31	5	3	1	5	8	10	13	18	8
1	15	26	18	15	25	26	18	43	13	8	8	5	0	2	11	6	4	4	3
1	23	12	11	8	32	23	11	25	6	9	0	3	3	0	3	1	7	2	6
1	19	32	9	14	17	19	18	66	24	11	13	10	1	9	6	11	4	7	5
1	30	5	22	16	29	25	19	37	3	16	2	0	1	1	5	5	6	10	7
1	16	23	10	15	24	27	20	52	19	13	6	6	7	2	5	9	5	8	4
1	23	29	17	13	18	26	19	77	26	15	15	9	2	9	6	14	6	9	7
1	10	32	17	13	15	30	11	22	4	4	3	1	0	1	1	6	4	0	6
1	6	25	10	16	34	27	14	47	19	2	4	10	5	8	9	4	1	1	5
1	14	15	23	20	27	36	18	42	10	15	9	0	1	4	2	8	5	10	3
1	20	15	11	14	23	22	12	47	10	15	7	2	1	6	3	7	5	10	6
1	16	20	14	17	24	28	9	20	2	7	1	1	0	1	2	3	2	5	5
1	24	26	12	12	19	24	17	97	30	18	13	8	9	11	13	14	3	15	11
1	21	22	15	11	18	22	14	61	19	18	11	7	1	4	2	11	7	11	7
1	15	22	10	14	19	32	20	30	12	3	3	8	1	3	3	7	3	0	2
1	24	32	10	14	23	30	22	84	30	20	17	10	3	8	8	9	5	15	9
1	28	18	22	19	29	35	17	36	4	15	3	1	0	3	3	8	4	11	3
1	16	20	16	16	18	31	7	70	17	17	13	4	0	20	7	3	7	10	6
1	21	7	18	18	32	32	21	15	1	8	0	1	0	1	0	3	5	3	2
1	12	22	18	14	26	30	14	17	3	6	2	1	0	0	2	1	2	4	5
1	21	14	19	11	19	31	18	46	12	13	7	3	2	5	6	5	4	9	5
1	19	26	16	16	19	20	27	59	14	20	10	2	2	5	6	9	5	15	5
1	13	28	15	15	18.5	30	14	9	2	2	0	2	0	1	2	2	1	1	0
1	25	30	24	15	25	28	21	57	25	12	12	5	8	2	6	8	3	9	4
1	18	19	14	16	26	26	17	8	1	3	1	0	0	0	1	0	3	0	3
1	26	17	19	10	28	26	26	42	7	17	2	5	0	3	4	7	4	13	4
1	20	32	19	16	21	24	11	60	18	17	13	3	2	6	7	8	3	14	4
1	24	2	9	22	36	27	19	38	6	18	2	2	2	3	2	3	6	12	6
1	22	28	19	16	25	29.5	22	53	11	14	6	5	0	7	6	8	3	11	7
1	23	24	14	14	18	26	21	51	15	9	8	4	3	6	9	8	2	7	4
1	29	16	16	9	27	22	9	110	33	32	13	10	10	12	13	9	15	17	11
1	19	7	20	17	37	29	9	25	0	13	0	0	0	2	3	2	6	7	5
1	24	21	21	8	18	32	11	43	2	20	1	0	1	4	2	9	10	10	6
1	21	26	10	13	22	30	19	24	7	4	2	5	0	2	3	6	1	3	2
1	23	23	20	16	24	24	26	34	7	13	6	1	0	2	1	6	4	9	5
1	24	22	11	10	24	16	20	126	37	39	13	11	13	15	13	11	17	22	11
1	15	4	25	21	36	36	24	1	0	0	0	0	0	0	0	0	0	0	1
1	3	35	13	15	14	28	5	39	22	2	9	11	2	5	3	3	1	1	4
1	18	17	14	18	26	22	18	39	9	11	7	2	0	4	4	4	3	8	7
1	24	24	14	12	18	23	20	13	3	1	3	0	0	2	3	2	1	0	2
1	25	34	12	11	6	19	12	96	32	18	18	14	0	11	8	15	4	14	12
1	20	27	16	14	22	27	17	44	13	19	5	5	3	4	4	3	9	10	1
1	10	23	16	14	15	21	10	23	9	1	8	1	0	4	2	6	0	1	1
1	19	14	14	12	23	19	12	44	13	13	8	3	2	5	3	6	4	9	4
1	20	19	11	15	23	25	17	28	8	10	2	4	2	2	1	3	4	6	4
1	23	14	17	20	33	31	19	23	1	9	1	0	0	3	3	5	2	7	2
1	25.5	28.5	15	14	21	32	23	24	6	4	2	1	3	3	2	5	0	4	4
1	15	14	11	15	26	21	10	5	1	1	0	1	0	0	0	2	1	0	1
1	26	18	8	11	15	23	13	45	12	11	3	7	2	4	5	8	4	7	5
1	25	20	18	15	26	26	17.5	22	2	11	1	0	1	1	1	3	4	7	4
1	13	20	12	9	17	33	18	33	11	7	6	4	1	0	5	8	3	4	2
1	14	29	20	14	21	31	14	9	3	3	2	1	0	0	0	2	1	2	1
1	18.5	24	14	14	21	27	12	46	18	12	7	6	5	3	3	5	3	9	5
1	20	23	15	19	32	31	13	30	10	12	6	2	2	3	2	2	3	9	1
1	17	28	12	13	23	31	19	38	12	6	7	4	1	5	4	6	1	5	5
1	27.5	21	8	11	27	18	5	51	9	20	4	5	0	5	4	7	7	13	6
1	34	16	21	13	19	35	18	63	14	20	6	4	4	6	7	11	8	12	5
1	13	28	14	12	16	22	10	31	9	6	4	5	0	5	3	6	3	3	2
1	15	22	17	14	21	26	18	13	4	2	3	1	0	1	1	5	0	2	0
1	18	18	13	16	21	29	20	31	9	9	4	3	2	5	3	2	2	7	3
1	13	25	11	17	27	26	20	32	8	5	3	3	2	2	1	14	2	3	2
1	16	20	10	7	20	18	9	94	33	25	15	9	9	9	13	6	13	12	8
1	11	17	16	18	35	31	20	16	3	6	2	1	0	0	1	3	3	3	3
1	12	26	11	16	20	23	15	13	4	1	1	2	1	0	1	4	0	1	3
1	12	20	19	16	25	29	16	29	7	7	6	1	0	2	6	5	2	5	2
1	13	17	20	14	33	30	15	33	8	3	6	2	0	2	6	10	0	3	4
1	16	24	14	16	23.5	28	18	28	7	6	4	2	1	1	6	4	2	4	4
1	13	28	15	12	22	20	7	30	11	7	4	6	1	2	1	7	5	2	2
1	19	16	20	15	23	33	19	28	2	6	2	0	0	2	4	9	2	4	5
1	17	15	13	17	26	34	13	12	3	2	2	1	0	1	0	5	2	0	1
1	17	31	15	11	15.5	27	15	60	11	17	7	3	1	8	6	12	2	15	6
1	28	12	25	14	25	35	21	19	5	5	3	0	2	3	1	3	1	4	2
1	18	30	19	17	19	32	16	16	5	3	3	1	1	0	3	4	2	1	1
1	10	8	12	9	30	16.5	2	25	4	10	3	1	0	2	2	5	3	7	2
1	24	22	15	10	19	26	16	39	9	6	5	3	1	4	2	13	3	3	5
1	24	19	11	11	26	15	14	31	8	10	3	4	1	1	1	6	2	8	5
1	31	24	15	13	11	24	18	84	14	31	9	2	3	6	9	15	8	23	9
1	21	25	15	11	19	19	18	57	15	12	9	3	3	8	6	8	4	8	8
1	33	23	18	11	28	28	16	98	31	27	13	8	10	11	12	9	11	16	8
1	26	16	18	16	20	29	16	64	7	23	5	1	1	5	11	11	6	17	7
1	20	15	12	12	19	25	14	24	9	6	2	1	6	1	4	2	3	3	2
1	19	20	17	14	26	28	9	15	0	7	0	0	0	0	3	1	2	5	4
1	17	20	19	17	30	32	16	18	5	6	2	2	1	2	1	4	3	3	0
1	21	23	19	17	33	28	16	30	8	2	2	3	3	3	7	5	0	2	5
1	19	23	17	14	22	23	12	24	5	10	1	1	3	1	3	5	4	6	0
1	24	32	17	9	8	22	11	59	17	16	6	6	5	4	7	11	5	11	4
1	27	22	15	17	27	23	18	24	8	4	2	4	2	2	3	4	1	3	3
1	24	25	11	12	15	19	14	57	18	13	6	8	4	5	8	6	4	9	7
1	24	25	20	10	24	26	20	32	6	11	4	1	1	2	3	6	6	5	4
1	13	26	11	15	15	28	20	38	18	2	5	10	3	5	3	5	1	1	5
1	19	12	17	17	25	31	14	24	4	8	2	2	0	2	0	6	5	3	4
1	14	24	24	19	13	36	24	41	14	7	10	4	0	7	5	5	3	4	3
1	20	21	14	13	20	20	15	104	31	32	13	8	10	11	12	9	15	17	9
1	10	22	12	14	19	22	12	17	3	1	2	1	0	2	2	6	1	0	3
1	22	18	16	13	24	25	18	23	3	7	2	0	1	2	3	3	2	5	5
1	28	18	18	16	26	28	19	35	4	11	1	1	2	4	4	6	6	5	6
1	23	26	20	17	21	30	26	28	7	5	5	0	2	2	5	5	3	2	4
1	34	33	13	10	9	19	7	78	19	25	8	8	3	13	5	11	12	13	5
1	16	34	14	16	14	17	20	69	19	20	13	4	2	8	8	10	5	15	4
1	32	33	19	7	10	25	15	76	27	12	13	12	2	10	5	16	4	8	6
1	11	11	17	20	31	37	27	11	3	6	2	1	0	0	0	1	3	3	1
1	24	16.5	14	15.5	26	27	13	39	11	16	1	2	8	2	2	5	6	10	3
1	29	16.5	14	13	26	28	8	61	5	25	1	0	4	5	8	8	12	13	10
1	20	14	23	12	25	29	18	44	4	12	1	0	3	9	1	13	4	8	5
1	17	21	19	15	26	32	17	54	6	18	2	3	1	3	10	9	10	8	8
1	29	33	16	19	16	28	24	69	14	18	10	2	2	8	10	9	3	15	10
1	21	28	16	9	19	22	14	73	27	18	12	11	4	8	5	7	7	11	8
1	28	29	13	12	17	21	18	68	20	18	12	5	3	3	8	8	5	13	11
1	15	24	19	15	21	25	13	28	13	4	5	6	2	0	3	2	2	2	6
1	19	24	9	10	13	17	7	54	18	8	7	9	2	7	8	11	3	5	2
1	23	28	19	12	15	31	21	45	11	18	3	4	4	4	1	4	8	10	7
1	16	14	11	15	21	26	19	64	12	20	5	5	2	14	7	7	8	12	4
1	26	33	16	14	10	20	28	113	35	31	20	9	6	12	17	10	13	18	8
1	19	27	14	15	25	28	11	67	13	17	4	7	2	11	6	15	10	7	5
1	11	16	13	13	19	21	7	27	6	8	2	4	0	4	0	4	1	7	5
1	15.5	15	12	8	23	28	19	33	7	6	0	4	3	3	4	7	4	2	6
1	8	38	15	14	18	29	17	64	25	15	13	8	4	9	5	5	3	12	5
1	24	27	18	13	18	17	20	36	7	16	5	1	1	2	3	4	7	9	4
1	20	15	20	17	28	27	18	41	11	10	5	5	1	4	7	3	2	8	6
1	19	22	12	14	29	28	20	34	12	10	5	6	1	5	1	3	5	5	3
1	21	27	21	19	25	29	15	15	4	6	3	1	0	1	2	1	2	4	1
1	21	22	12	11	20	21	19	22	3	9	3	0	0	5	1	2	3	6	2
1	12	21	20	20	26	33	15	28	9	7	3	2	4	3	1	2	2	5	6
1	21	26	15	15	21	28	16	38	8	14	6	2	0	4	2	7	6	8	3
1	29	32	15	14	14	25	24	59	18	14	7	6	5	6	5	8	4	10	8
1	17	29	16	20	29	33	16	42	13	8	5	3	5	2	8	4	4	4	7
1	12	29	15	17	18	30	20	42	14	8	7	6	1	5	7	5	1	7	3
1	21	17	14	14	26	14	9	53	12	18	10	1	1	4	9	6	6	12	4
1	22	30	12	7	15	23	15	46	14	7	7	6	1	7	5	8	2	5	5
1	22	29	11	14	19	27	20	73	29	13	10	8	11	6	9	9	1	12	7
1	19	7	21	18	30	32	9	28	7	8	4	0	3	4	2	5	3	5	2
1	26	15	10	11	23	22	17	29	6	10	0	4	2	2	2	6	3	7	3
1	22	20.5	11	12	25	27	15	85	21	30	10	6	5	11	14	4	15	15	5
1	18	19	16	12	23	30	23	7	2	3	1	1	0	0	2	0	1	2	0
1	15	27	15	14	20	27	22	19	5	3	2	3	0	1	1	4	1	2	5
1	14	26	12	10	18	26	14	51	20	8	8	10	2	6	5	5	2	6	7
1	22	30	15	14	15	30	22	63	13	19	7	5	1	5	7	11	4	15	8
1	20	25	20	10	13	25	9	56	20	14	11	6	3	4	4	10	7	7	4
1	16	29	19	12	15	36	11	20	6	2	2	3	1	2	1	8	0	2	1
1	27	10	18	16	25	28	14	18	1	5	0	1	0	0	3	3	3	2	6
1	25	17	15	15	16	25	18	82	25	24	10	7	8	10	13	3	12	12	7
2	20	33	21	13	23	25	16	44	16	8	8	2	6	3	6	6	0	8	5
2	15	31	17	12	25	31	21	30	10	3	4	3	3	3	3	8	0	3	3
2	18	31	19	12	20	26	19	37	8	8	4	3	1	4	6	9	0	8	2
2	23	9	19	16	27	24	15	20	7	6	2	2	3	2	3	1	3	3	1
2	20	31	24	14	20	32	17	36	14	3	9	4	1	5	3	7	1	2	4
2	24	30	16	15	12	21	20	40	9	9	5	4	0	7	2	8	1	8	5
2	30	16	19	9	28	21	18	19	0	5	0	0	0	1	1	9	0	5	3
2	24	19	19	13	23	27	14	26	7	8	2	3	2	3	2	3	3	5	3
2	14	24	18	14	26	30	16	21	10	2	4	3	3	4	1	4	0	2	0
2	10	17	27	19	29	35	22	22	5	5	5	0	0	2	2	5	1	4	3
2	15	26	23	15	17	35	20	40	14	5	11	0	3	3	3	9	0	5	6
2	25	20	14	13	19	26	18	65	24	13	9	5	10	7	8	9	2	11	4
2	21	32	16	15	22	30	21	69	27	14	14	11	2	7	7	11	2	12	3
2	19	31	23	15	16	31	22	46	18	5	12	3	3	4	8	8	0	5	3
2	13	29	21	13	17	29	18	47	14	9	7	1	6	4	6	8	2	7	6
2	13	24	18	19	29	31	27	34	9	6	4	3	2	1	7	4	3	3	7
2	21	24	15	15	19	19	14	54	15	17	7	7	1	4	5	6	4	13	7
2	23	18	22	15	21	35	16	54	10	11	6	2	2	7	6	12	3	8	8
2	24	22	19	16.5	19	29	8	24	6	9	4	1	1	2	1	4	3	6	2
2	17	25	23	18	21	27	18	35	11	9	7	3	1	4	3	5	2	7	3
2	22	24	18	14	24	26	18	35	9	11	5	2	2	1	5	5	1	10	4
2	24	13	19	14	28	29	23	12	0	3	0	0	0	1	1	5	1	2	2
2	25	26	19	10	14	21	17	52	19	10	13	3	3	8	2	10	1	9	3
2	27	14	20	10	20	22	15	29	9	7	1	2	6	3	1	4	2	5	5
2	26	24	18	11	21	27	22.5	69	27	20	14	6	7	4	1	11	4	16	6
2	9	13	23	18	32	34	19	15	7	0	1	2	4	2	3	1	0	0	2
2	26	15	24	13	24	26	15	24	5	7	4	0	1	1	2	6	2	5	3
2	27	22	21	12	18	24	12	29	4	12	2	1	1	5	2	4	1	11	2
2	23	16	14	14	27	24	14	15	4	2	1	1	2	1	2	2	1	1	4
2	16	23	11	18	18	30	11	57	26	14	12	8	6	2	6	3	5	9	6
2	27	24	15	12	18	25	19	30	4	10	2	1	1	3	2	8	1	9	3
2	20	17.5	20	18.5	25.5	27	22	16	6	6	4	1	1	0	1	1	2	4	2
2	32	20	17	10	23	20	16	38	9	12	7	1	1	3	4	7	5	7	3
2	23	31	16	11	12	21	17	79	26	12	11	7	8	10	6	15	1	11	10
2	12	23	16	11	18	28	14	17	3	2	1	2	0	2	2	7	1	1	1
2	16	29	9	18	29	21	20	47	23	8	7	4	12	2	7	3	1	7	4
2	19	36	20	14	16	25	16	44	16	8	7	4	5	4	4	8	1	7	4
2	16	18	25	17	26.5	35	20	25	5	6	5	0	0	4	2	4	1	5	4
2	15	19	16	16	24	31	17	31	11	8	3	4	4	1	2	6	5	3	3
2	10	17	20	18	28	36	22	36	13	6	7	2	4	5	3	4	3	3	5
2	16	12	12	15	26	28	18	36	8	8	1	2	5	2	6	6	5	3	6
2	22	21	13	13	25	22	19	33	6	11	4	1	1	3	3	5	2	9	5
2	19	10	15	12	24	28	16	20	4	8	2	1	1	0	0	7	3	5	1
2	14	13	21	17.5	36	33	13	5	1	2	1	0	0	0	1	0	1	1	1
2	28	23	23	13	24	34	27	58	18	12	12	2	4	4	8	8	1	11	8
2	13	21	20	15	26	29	18	34	13	4	4	4	5	5	3	6	0	4	3
2	21	22	19	17	22	29	18	31	8	9	4	3	1	2	2	5	2	7	5
2	20	23	19	13	21	26	17	57	21	14	11	4	6	7	4	7	3	11	4
2	16	18	18	15	25.5	29	17	26	12	4	5	3	4	1	4	4	1	3	1
2	26	33	11	10	15	23	18	94	40	13	17	13	10	9	9	13	2	11	10
2	10	19	19	14	27	26	17	17	7	2	3	3	1	3	1	1	1	1	3
2	27	12	22	14	21	27	11	38	5	13	4	0	1	5	4	7	4	9	4
2	21	15	17	18	26	34	18	52	17	11	7	4	6	5	5	7	5	6	7
2	8	32	23	14	18	31	10	30	16	2	8	4	4	3	1	4	0	2	4
2	14	24	22	15.5	25	27	20	12	1	2	1	0	0	1	1	7	0	2	0
2	19	19	22	18	27	29	22	20	10	3	4	1	5	0	2	4	1	2	1
2	27	9	20	19	28	30	24	27	6	5	1	0	5	0	3	7	1	4	6
2	15	21	25	14	35	35	23	11	1	5	1	0	0	0	2	1	2	3	2
2	21	31	21	11	11	35	19	84	28	12	16	8	4	11	9	17	1	11	7
2	16	33	13	13.5	17	28	22	31	12	7	5	5	2	3	1	4	3	4	4
2	30	25	23	12	27	35	22	25	5	7	4	1	0	2	1	4	0	7	6
2	13	29	13	11	14	25	11	45	13	8	5	8	0	11	1	8	2	6	4
2	23	38	15	9	7	22	9	91	40	16	19	9	12	9	9	11	5	11	6
2	18	17	25	17	31	23	22	20	5	7	4	1	0	3	1	2	3	4	2
2	25	20	14	17	23	27	16	30	9	9	6	3	0	0	1	7	3	6	4
2	27	30	21	7	14	24	18	82	30	20	17	8	5	5	10	10	5	15	7
2	21	16	14	16	28	27	16	28	9	5	2	2	5	2	3	5	1	4	4
2	24	17	21	19	13	27	23	20	6	4	4	2	0	1	3	3	1	3	3
2	16	16	23	19	30	26	24	35	11	5	7	1	3	4	4	4	0	5	7
2	24	21	12	7	16	24	16	44	13	9	7	5	1	3	6	9	1	8	4
2	12	24	17	16	20	32	18	33	9	7	5	4	0	5	3	6	3	4	3
2	26	25	21	15	21	22	18	29	5	9	2	1	2	1	4	4	1	8	6
2	23	20	20	10	23	19	10	27	1	11	1	0	0	1	1	6	2	9	7
2	31	11	17	12	30	19	10	15	4	4	3	1	0	2	1	3	0	4	1
2	13	30	16	13	13	29	25	32	13	5	7	6	0	3	4	6	1	4	1
2	30	18	24	15	17	29	21	58	15	16	7	4	4	5	7	9	5	11	6
2	23	20	26	14	19	30	21	44	13	10	11	0	2	2	6	7	2	8	6
2	13	26	18	9	14	25	12	42	18	5	4	3	11	2	4	8	0	5	5
2	21	14	17	12.5	20	28	18	37	4	12	2	1	1	4	4	6	4	8	7
2	20	13	15	20	32	32	23	20	3	7	3	0	0	0	2	2	1	6	6
2	20	22	19	8	18	21	11	49	10	17	7	3	0	5	6	6	5	12	5
2	27	9	14	16	29	21	20	50	10	12	4	1	5	1	11	8	4	8	8
2	21.5	20	19	12	18	31	22	21	5	5	3	2	0	2	1	6	0	5	2
2	25	20	14	12	16	22	18	64	13	21	6	7	0	5	8	10	7	14	7
2	12	28	17	12	17	26	11	23	9	3	4	2	3	1	3	4	1	2	3
2	20	28	12	12	20	23	20	64	21	13	8	8	5	8	6	9	4	9	7
2	23	18	22	12	17	30	8	39	12	14	6	0	6	3	1	3	2	12	6
2	19	20	22	18	27	25	15	47	10	16	8	1	1	3	3	5	3	13	10
2	19	24.5	16	8	14	17	16	52	17	15	6	3	8	4	4	9	4	11	3
2	22	24	20	11	18	28	24	71	24	15	12	3	9	8	6	10	3	12	8
2	22	24	15	16	13	24	19	52	12	15	7	5	0	4	8	8	4	11	5
2	16	13	17	17	27	25	17	33	6	10	5	1	0	4	3	6	2	8	4
2	14	17	19	17	28	28	14	37	6	12	3	1	2	5	3	6	3	9	5
2	17	30	17	14.5	19	34	27	52	19	11	11	5	3	5	6	8	3	8	3
2	20	28	19	13	26	27	21	38	13	5	10	3	0	3	3	10	0	5	4
2	27	36	14	10	9	22	12	117	53	18	24	15	14	8	15	15	3	15	8
2	21	6	13	10	21	30	21	38	6	8	0	5	1	4	4	11	2	6	5
2	20	29	20	11	19	37	20	29	10	5	9	1	0	2	2	5	1	4	5
2	24	27	23	9	13	33	24	86	24	22	14	6	4	9	6	16	10	12	9
2	23	24	10	10	11	16	8	81	35	16	15	10	10	7	7	9	3	13	7
2	20	19	16	19	26	33	19	27	10	4	5	3	2	3	2	4	1	3	4
2	22	20	26	11	26	33	9	21	9	2	5	0	4	2	2	4	2	0	2
2	28	24	16	11	19	31	23	38	7	10	5	1	1	3	3	9	5	5	6
2	15	33	12	10	15	26	15	72	29	13	14	10	5	10	5	9	3	10	6
2	18	24	18	9	21	28	21	31	9	4	4	2	3	2	3	9	2	2	4
2	19	20	17	16	16	25	17	28	11	2	8	2	1	4	2	6	1	1	3
2	16	22	20	16	21	28	19	36	5	10	4	0	1	3	4	7	2	8	7
2	13	16	19	10	24	28	17	3	0	0	0	0	0	0	1	2	0	0	0
2	25	11	13	14	24	28	22	28	9	8	5	0	4	1	1	5	1	7	4
2	21	12	10	15	26	15	8	32	14	8	5	3	6	2	4	1	3	5	3
2	26	12	12	15	23	29	22	43	16	12	4	4	8	5	1	4	1	11	5
2	28	19	23	9	25	26	11	13	6	2	1	1	4	0	1	2	0	2	2
2	13	28	19	17	10	35	20	70	28	7	13	7	8	14	6	11	3	4	4
2	19	4	14	16	25	26	15	41	14	8	5	1	8	2	5	4	0	8	8
2	27	9	23	18	26	29	15	48	17	11	5	9	3	4	6	7	3	8	3
2	22	31	23	10	15	32	18	40	10	9	5	2	3	5	5	9	3	6	2
2	32	25	23	10	23	27	23	75	27	13	16	5	6	5	11	10	0	13	9
2	28	21	17	11	21	23	25	67	25	12	14	2	9	7	8	7	1	11	8
2	22	24	11	8	18	21	14	91	27	27	12	8	7	12	8	11	8	19	6
2	22	18	25	10	21	34	27	57	26	6	10	5	11	5	5	12	0	6	3
2	17	22	16	14	20	25	19	9	4	1	4	0	0	1	1	2	0	1	0
2	25	31	12	8	9	19	20	61	15	14	9	5	1	6	6	15	1	13	5
2	25	17	20	16	26	25	20	26	5	4	3	2	0	5	2	8	0	4	2
2	17	21	17	14	22	26	17	36	14	3	5	6	3	4	3	7	1	2	5
2	14	24	17	12	24	31	18	19	6	3	4	2	0	2	1	5	2	1	2
2	22	12	15	15	26	27	18	27	5	8	4	1	0	0	2	6	2	6	6
2	15	22	21	11	23	28	14	11	0	2	0	0	0	2	2	3	1	1	2
2	15	28	19	15	12	31	16	19	7	3	4	2	1	3	1	5	0	3	0
2	18	35	24	13.5	19	32	25	56	23	10	12	6	5	3	4	10	1	9	6
2	18	22	22	14	22	30	21	44	13	11	8	3	2	3	3	9	2	9	5
2	11	34	17	14	14	31	17	63	30	12	16	7	7	6	5	7	1	11	3
2	28	25	22	10	30	30	15	49	15	9	7	2	6	4	6	10	2	7	5
2	28	39	14	11	2	12	22	118	42	27	19	13	10	12	12	16	4	23	9
2	7	29	18	11	18	22	13	34	13	3	9	3	1	3	2	12	0	3	1
2	13	21	17	16	27	39	30	56	23	9	13	6	4	4	7	8	5	4	5
2	24	25	15	12	19	21	18	83	25	18	12	4	9	11	8	13	6	12	8
2	30	21	16	14	19	23	15	52	14	10	6	1	7	8	9	8	2	8	3
2	23	11	20	19	34	27	26	18	3	6	1	2	0	0	1	4	1	5	4
2	18	30	7	7	15	28	25	39	13	5	8	3	2	4	3	11	1	4	3
2	13	19	20	18	29	34	15	36	11	10	8	2	1	4	1	6	3	7	4
2	25	24	13	11	18	27	16	66	20	13	7	6	7	6	7	9	4	9	11
2	13	18	14	12	22	26	13	34	13	6	5	4	4	4	4	5	3	3	2
2	17	36	17	13	17	22	13	55	23	10	15	3	5	6	4	9	2	8	3
2	17	22	19	19	27	29	19	21	7	4	5	2	0	2	2	2	0	4	4
2	23	18	18	16	25	32	18	53	12	9	5	5	2	6	8	12	2	7	6
2	16	13	17	14	23.5	24	8	32	16	5	5	4	7	2	2	3	1	4	4
2	19	30	10	13	18	27	16	49	19	7	9	6	4	5	6	9	1	6	3
2	10	26	12	10	15	28	17	50	21	8	9	5	7	2	4	9	1	7	6
2	28	21	15	11	19	22	20	37	14	7	3	5	6	2	3	6	2	5	5
2	17	25	16	11	26	29	10	73	24	14	15	4	5	8	8	10	2	12	9
2	18	18	21.5	14	30	33	23	33	5	7	5	0	0	3	6	6	3	4	6
2	18	19	15	21	36	33	15	14	7	2	2	0	5	2	1	0	0	2	2
2	17	21	21	16	23	34	28	45	19	7	8	7	4	3	4	6	2	5	6
2	25	26	17.5	7	12	24	9	60	10	19	4	6	0	4	9	10	7	12	8
2	23	23	25	12	21	23	15	36	8	8	6	1	1	3	4	8	1	7	5
2	21	13	22	9	14	28	18	30	4	6	4	0	0	1	1	8	2	4	10
2	21	20	19	13	19	22	8	14	4	5	3	1	0	0	2	2	1	4	1
2	20	11	19	17	23	32	16	53	18	10	5	4	9	5	6	6	2	8	8
2	19	19	26	18	29	32	20	16	4	4	4	0	0	2	1	4	0	4	1
2	23.5	36	16	4	9	31	18	67	25	14	8	9	8	7	4	11	1	13	6
2	20	24	16	14	18	25	21	54	12	14	5	4	3	7	5	9	3	11	7
2	23	14.5	16.5	12	19	28	14	27	2	9	2	0	0	1	2	7	1	8	6
2	24	21	19	16	22	28	22	27	6	5	1	0	5	1	2	6	1	4	7
2	23	23	20	13	23	25	22	31	7	9	4	1	2	4	1	6	2	7	4
2	18	22	17	19	26	31	20	29	13	4	3	4	6	2	1	7	1	3	2
2	27	13	20	11	18	26	23	41	10	11	3	4	3	2	4	7	3	8	7
2	27	24	17	14	23	25	19	77	23	23	11	6	6	8	6	11	4	19	6
2	22	15	8	14	25	15	12	42	14	15	5	5	4	1	5	4	6	9	3
2	17	17	14	13	29	24	22	41	11	8	4	0	7	4	9	6	1	7	3
2	16	24	15	18	24	31	24	74	34	14	13	10	11	2	7	12	5	9	5
2	29	25	24	10	14	23	17	74	31	19	9	5	17	5	3	9	6	13	7
2	11	35	20	15	17	27	22	41	15	5	10	4	1	4	5	8	1	4	4
2	18	11	24	20	29	34	29	17	5	2	4	0	1	0	3	6	0	2	1
2	17	29	17	14	21	26	16	46	27	5	9	2	16	1	3	7	1	4	3
2	20	12	21	22	33	38	26	31	6	4	3	0	3	2	6	7	1	3	6
2	18	25	14	9	19	25	16	36	11	4	6	4	1	5	4	8	1	3	4
2	12	31	12	12.5	24	19	12	59	19	16	10	6	3	6	5	6	3	13	7
2	15	24	19	18	18	31	25	32	10	8	7	1	2	3	3	7	1	7	1
2	24	30	9.5	6	18.5	13.5	13	44	14	11	6	7	1	2	5	5	2	9	7
2	20	23	15	10	18	31	14	6	1	2	1	0	0	0	0	2	1	1	1
2	17	32	23	17	19	33	25	34	11	3	8	3	0	7	4	2	0	3	7
2	17	22	19	14	19	29	20	21	6	3	4	1	1	2	3	5	0	3	2
2	18	13	15	19	29	28	19	19	5	2	3	2	0	4	2	4	0	2	2
2	14	33	17	9	12	26	7	44	12	11	7	4	1	3	6	8	2	9	4
2	20	32	14	15	20	24	16	24	11	4	8	2	1	2	2	5	0	4	0
2	19	16	22	16	26	36	25	35	6	5	2	0	4	6	2	10	1	4	6
2	23	27	19	13	19	32	18	43	13	11	8	2	3	4	2	8	2	9	5
2	22	28	13	11	26	30	15	41	18	7	9	4	5	4	4	4	1	6	4
2	25	35	16	12	9	26	17	86	32	14	14	11	7	8	12	14	4	10	6
2	18	27	17	12	22	24	13	24	8	5	6	0	2	3	3	3	1	4	2
2	24	34	16	13	14	27	18	39	16	7	8	6	2	2	5	5	2	5	4
2	20	17	17	9	15	24	11	19	5	1	1	2	2	2	1	7	1	0	3
2	22	26	23	15	19	25	21	36	7	13	4	0	3	4	5	4	1	12	3
2	33	29	6	10	15	20	19	109	29	31	11	5	13	13	13	14	12	19	9
2	27	27	15	13	21	23	16	58	25	13	11	7	7	3	6	11	3	10	0
2	15	31	21	13	16	25	19	15	7	0	4	2	1	2	2	4	0	0	0
2	38	25	23	8	7	28	23	94	26	28	18	1	7	9	4	15	10	18	12
2	28	12	23	16	14	28	15	19	4	3	4	0	0	0	3	3	0	3	6
2	18	26	14	14	15	25	9	43	17	12	8	3	6	3	1	4	4	8	6
2	14.5	12	11	14	22	24	10	19	7	7	2	4	1	2	1	1	1	6	1
2	13	24	12	11	17	26	16	45	15	9	5	7	3	6	5	7	2	7	3
2	23	25	15	14	16	22	15	34	11	8	5	2	4	5	1	8	0	8	1
2	25	23	18	17	18	24	14	50	17	13	7	4	6	4	5	6	3	10	5
2	28	24	18	10	17	26	16	93	26	26	9	8	9	6	8	14	12	14	13
2	18	28	11	11	13	22	14	52	22	6	11	5	6	7	6	9	1	5	2
2	24	12	19	16	25	35	24	42	12	10	5	3	4	4	7	5	5	5	4
2	21	17	18	12	27	30	15	12	2	3	1	0	1	0	1	2	0	3	4
2	24	26	17	12	17	22	20	49	12	10	5	5	2	6	5	10	3	7	6
2	32	10	22	12	28	29	7	40	6	17	4	0	2	4	4	5	5	12	4
2	12	22	17	18	33	30	24	18	5	4	3	1	1	2	2	3	1	3	2
2	11	21	19	10	29	35	6	13	5	1	3	1	1	2	1	3	0	1	1
2	8	27	11	13	32	26	12	22	9	2	2	5	2	1	2	7	0	2	1
2	27	16	15	14	26	22	14	24	7	7	5	2	0	1	0	4	1	6	5
2	20	26	12	13	19	23	19	32	12	7	6	2	4	4	3	1	3	4	5
2	17	19	18	16	20	25	17	19	9	4	5	2	2	1	1	3	0	4	1
2	17	25	17	12	20	31	21	54	14	7	9	3	2	5	7	11	3	4	10
2	18	23	27	13	26	26	16	27	9	5	8	0	1	4	2	6	1	4	1
2	20	28	11	11	18	26	17	33	10	6	3	3	4	4	2	6	1	5	5
2	21	7	19	17	27	30	17	20	3	7	2	1	0	1	3	2	1	6	4
2	19	23	16	16	24	25	17	73	31	15	13	7	11	6	7	7	3	12	7
2	17	20	18	15	25	28	23	10	4	1	2	1	1	0	0	4	0	1	1
2	24	26	19	20	26	26	28	35	9	10	6	1	2	7	2	4	2	8	3
2	21	17	21	13	23	29	16	19	3	5	2	1	0	1	2	5	0	5	3
2	15	20	18	14	25	36	17	16	8	2	5	3	0	0	1	2	0	2	3
2	29	23	21	11.5	26	19	22	42	9	11	4	2	3	5	4	5	3	8	8
2	16	11	24	15	26	38	24	13	1	2	1	0	0	1	1	5	1	1	3
2	23	17	12	13	23	20	23	12	2	0	1	0	1	2	2	5	0	0	1
2	23	29	17	13	19	28	20	65	23	11	13	4	6	4	8	9	1	10	10
2	22	25	19	10	18	18	20	33	7	8	3	2	2	1	2	10	2	6	5
2	34	22	23	14	31	20	18	80	25	22	9	6	10	8	11	6	12	10	8
2	22	23	19	13	21	31	21	30	11	5	6	3	2	3	3	5	1	4	3
2	17	25	13	13	15	39	15	43	24	3	14	7	3	4	0	9	0	3	3
2	22	21	16	13	24	32	19	31	10	4	4	3	3	2	3	6	0	4	6
2	24	22	21	14	20	30	22	38	7	8	3	2	2	2	3	9	1	7	9
2	18	26	12	13	22	29	16	27	10	5	6	4	0	1	2	6	1	4	3
2	12	29	16	13	21	28	16	46	12	12	5	5	2	4	3	10	3	9	5
2	10	23	18	19	20	31	12	20	10	4	6	2	2	0	4	2	0	4	0
2	19	20	11	11	13	22	14	37	10	3	5	4	1	7	6	10	0	3	1
2	18	21	25	21	26	31	19	30	11	3	8	0	3	3	2	6	0	3	5
2	20	24	13	11	18	27	12	36	10	8	4	5	1	5	2	6	4	4	5
2	36	23	19	7	10	22.5	16.5	106	20	33	13	3	4	18	9	15	12	21	11
2	22	25	23	16	25	29	17	35	10	9	7	2	1	3	2	6	0	9	5
2	25	36	19	15	10	29	19	80	30	14	12	9	9	7	10	13	4	10	6
2	11	19	19	16	26	25	12	26	9	7	7	1	1	4	2	2	0	7	2
2	22	37	12	4	6	18	18	88	29	21	17	8	4	10	9	15	3	18	4
2	29	35	21	14	14	23	17	45	11	16	5	5	1	3	4	7	3	13	4
2	31	23	15	17	25	25	11	24	6	9	5	1	0	1	1	4	0	9	3
2	15	20	14	12	23	28	12	18	7	4	1	2	4	2	1	4	0	4	0
2	21	18	19	16	30	27	17	42	12	17	8	2	2	5	4	2	5	12	2
2	19	23	14	13	20	24.5	14	21	10	5	4	4	2	1	1	3	0	5	1
2	27	23	21	13	25	21	26	41	10	8	4	2	4	7	3	6	2	6	7
2	16	34	21	12	19	20	12	41	11	8	6	4	1	2	4	9	2	6	7
2	32	23	11	10	19	19	11	59	14	17	5	7	2	4	6	9	5	12	9
2	16	36	13	9	20	22	21	81	24	13	10	12	2	12	14	10	4	9	8
2	18	16	16	16	27	29	21	24	9	6	4	3	2	3	1	4	2	4	1
2	20	27	10	17	25	29	17	63	31	8	9	9	13	4	10	4	1	7	6
2	18	21	19	14	18	22	13	17	3	4	2	1	0	4	0	5	0	4	1
2	24	31	19	16	18	27	21	49	21	10	10	5	6	4	4	7	1	9	3
2	25	32	17	8	16	14	12	77	29	20	14	8	7	9	5	10	7	13	4
2	25	28	21	16	21	25	17	29	9	5	5	1	3	2	3	7	2	3	3
2	8	22	17	18	26	39	25	31	16	3	6	6	4	7	2	2	0	3	1
2	13	22	17	13	22	36	16	25	7	4	5	2	0	1	2	8	0	4	3
2	33	22	20	14	18	24	17	53	13	17	4	1	8	5	6	10	10	7	2
2	18	33	19	13	9	29	17	15	4	2	2	2	0	3	1	4	0	2	1
2	20	29	22	12	22	20.5	19	72	17	27	9	2	6	7	8	6	7	20	7
2	31.5	23	21	7	16	30	14	50	21	9	7	5	9	5	4	6	3	6	5
2	18	28	13	15	18	27	22	29	11	3	7	3	1	3	3	6	1	2	3
2	31	16	20	14	20	31	20	31	5	12	3	2	0	2	2	7	3	9	3
2	19	25	17	14	22	27	16	23	8	3	4	3	1	2	1	8	1	2	1
2	24	27	17	11	17	32	17	46	22	10	13	6	3	2	2	6	1	9	4
2	15	21	15	17	23	23	10	21	5	5	3	2	0	7	1	2	2	3	1
2	16	19	19	16	25	27	16	26	4	7	3	1	0	0	3	6	3	4	6
2	15	29	18	17	15	26	28	32	17	6	10	6	1	4	2	3	0	6	0
2	20	31	14	13	17	24	14	46	18	5	10	7	1	5	5	10	1	4	3
2	25	19	18	12	24	24	20	17	4	2	3	1	0	2	1	8	0	2	0
2	25	15	14	15	28	24	22	44	14	11	9	1	4	5	4	5	4	7	5
2	23	24	12	15	14	16	15	89	28	22	11	6	11	9	9	11	6	16	10
2	9	16	19	20	30	39	28	14	8	1	2	1	5	0	2	1	0	1	2
2	10	15	25	18	32	39	22	11	3	3	1	0	2	1	1	1	1	2	2
2	10	27	13	11	14	27	12	30	14	3	8	4	2	3	5	4	0	3	1
2	16	19	22	16	27	27	19	8	3	3	1	2	0	0	0	1	1	2	1
2	23	22	12	11	15	26	17	35	12	9	4	4	4	4	2	8	2	7	0
2	21	4	19	22	41	36	18	11	3	4	3	0	0	0	0	1	0	4	3
2	30	13	25	20	32	35	30	30	3	8	3	0	0	5	2	6	1	7	6
2	19	24	26	17	31	34	21	32	8	11	2	1	5	1	2	5	7	4	5
2	26	19	27	17	28	34	19	38	12	7	10	0	2	1	4	6	2	5	8
2	27	30	17	6	17	16	16	106	38	25	15	9	14	15	10	11	8	17	7
2	17	22	21	16	20	30	13	31	9	5	6	3	0	2	2	8	3	2	5
2	27	35	19	11	17	18	14	50	19	10	8	5	6	4	3	9	3	7	5
2	18	26	14	20	24	26	21	35	12	4	4	5	3	5	2	6	1	3	6
2	20	16	20	20	29	25	21	21	5	7	2	0	3	1	2	1	5	2	5
2	30	11	16	12	30	22	14	44	16	12	5	5	6	5	1	6	3	9	4
2	22	23	21	15	18	30	15	24	1	7	1	0	0	3	2	8	1	6	3
2	27	18	24	14	22	34	15	60	24	10	14	3	7	9	3	8	2	8	6
2	23	15	15	10	23	23	23	63	20	12	12	3	5	6	9	7	3	9	9
2	18	31	21	14	25	25	21	20	4	4	3	1	0	1	5	3	1	3	3
2	24	24	13	14	29	23.5	16	23	7	7	3	2	2	2	1	4	1	6	2
2	23	19	16	12	24	25	20	52	15	16	8	4	3	4	2	10	3	13	5
2	26	23	15	11	12	31	28	51	23	5	11	6	6	7	5	9	4	1	2
2	19	33	24	17	11	26	16	46	13	10	8	1	4	6	3	8	1	9	6
2	29	23	15	12	20	25	15	24	6	7	2	3	1	4	1	4	1	6	2
2	18	29	24	18	23	33	20	41	21	3	11	3	7	2	6	5	0	3	4
2	17	31	21	19	23	25	22	30	17	2	9	3	5	3	2	4	0	2	2
2	15	27	19	19	30	32	24	19	8	2	5	2	1	3	3	1	0	2	2
2	27	27	12	14	20	27	15	61	28	6	12	10	6	11	7	5	1	5	4
